# Supplementary material for: Genome-Wide Analysis, Characterization, and Expression Profile of the Basic Leucine Zipper Transcription Factor Family in Pineapple
Source: Hindawi journal article supplement (doi:10.1155/2020/3165958), 2020-05-11

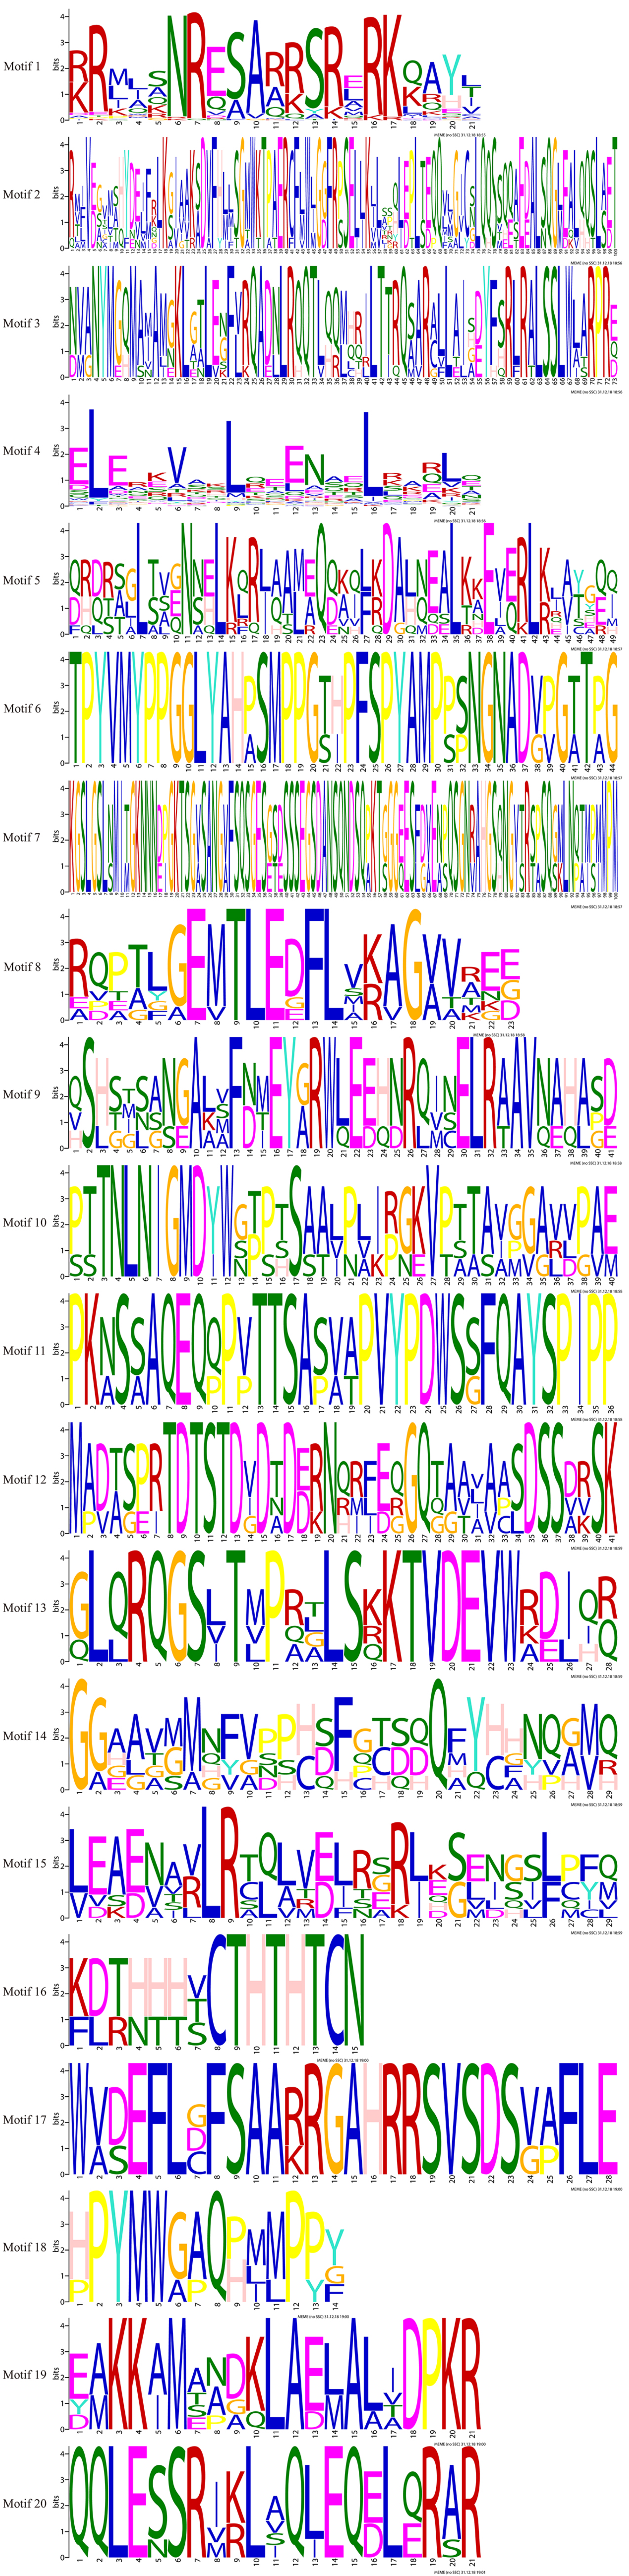

Supplement: f1 [file 3165958.f1.pdf]
