# Supplementary material for: Genome-Wide Analysis, Characterization, and Expression Profile of the Basic Leucine Zipper Transcription Factor Family in Pineapple
Source: Int J Genomics. 2020 May 11;2020:3165958. doi: 10.1155/2020/3165958 (PMC7238347; doi:10.1155/2020/3165958)
Supplement: Supplementary 2 — Table S1: the accession numbers of bZIPs in pineapple, Arabidopsis, and rice. [file 3165958.f2.xlsx]

## Sheet: Sheet1
Table S1. The accession numbers of bZIPs in pineapple, Arabidopsis and rice.
Gene name	Gene ID	Chromosome	Start	End	Amino acids	MW(kDa)	PI	AT Gene name	AT Gene ID	Os Gene name	Os Gene ID
AcobZIP1	Aco000921.1	LG02	15655627	15656196	189	21.945	8.93	ATbZIP1	AT5G49450	OsbZIP01	LOC_Os01g07880
AcobZIP2	Aco001064.1	LG02	14511360	14514316	390	42.682	5.63	ATbZIP10	AT4G02640	OsbZIP02	LOC_Os01g11350
AcobZIP3	Aco001167.1	LG02	13699026	13712045	387	43.648	6.43	ATbZIP11	AT4G34590	OsbZIP03	LOC_Os01g17260
AcobZIP4	Aco001326.1	LG02	12318327	12324385	444	45.023	8.02	ATbZIP12	AT2G41070	OsbZIP04	LOC_Os01g36220
AcobZIP5	Aco001636.1	LG18	9110584	9115217	405	43.534	6.32	ATbZIP13	AT5G4408	OsbZIP05	LOC_Os01g46970
AcobZIP6	Aco001707.1	LG18	8568782	8569996	244	26.036	9	ATbZIP14	AT4G35900	OsbZIP06	LOC_Os01g55150
AcobZIP7	Aco001737.1	LG18	8353972	8359188	470	51.269	7.17	ATbZIP15	AT5G42910	OsbZIP07	LOC_Os01g58760
AcobZIP8	Aco001785.1	LG18	7971524	7971955	143	17.061	9.66	ATbZIP16	AT2G35530	OsbZIP08	LOC_Os01g59350
AcobZIP9	Aco002544.1	LG04	810993	811430	145	16.73	7.77	ATbZIP17	AT2G40950	OsbZIP09	LOC_Os01g59760
AcobZIP10	Aco003049.1	LG06	13476104	13476649	181	20.695	6.31	ATbZIP18	AT2G40620	OsbZIP10	LOC_Os01g64000
AcobZIP11	Aco003175.1	LG17	891924	893518	264	26.746	5.97	ATbZIP19	AT4G35040	OsbZIP11	LOC_Os01g64020
AcobZIP12	Aco004337.1	LG05	2291827	2293915	249	27.472	5.75	ATbZIP2	AT2G18160	OsbZIP12	LOC_Os01g64730
AcobZIP13	Aco004970.1	LG07	1126129	1126569	146	16.546	8.88	ATbZIP20	AT5G06950	OsbZIP13	LOC_Os02g03580
AcobZIP14	Aco005226.1	LG07	3074742	3080824	478	50.074	5.21	ATbZIP21	AT1G08320	OsbZIP14	LOC_Os02g03960
AcobZIP15	Aco005538.1	LG11	11076397	11084819	218	43.982	6.2	ATbZIP22	AT1G22070	OsbZIP15	LOC_Os02g07840
AcobZIP16	Aco006270.1	LG14	3726225	3732243	332	37.181	8.83	ATbZIP23	AT2G16770	OsbZIP16	LOC_Os02g09830
AcobZIP17	Aco007192.1	LG23	2317278	2322188	312	34.097	6.94	ATbZIP24	AT3G51960	OsbZIP17	LOC_Os02g10140
AcobZIP18	Aco007216.1	LG23	2494844	2501383	474	51.488	7.77	ATbZIP25	AT3G54620	OsbZIP18	LOC_Os02g10860
AcobZIP19	Aco007362.1	LG23	4028571	4028984	137	16.281	7.97	ATbZIP26	AT5G06960	OsbZIP19	LOC_Os02g14910
AcobZIP20	Aco007826.1	LG21	10199414	10206715	333	36.909	8.92	ATbZIP27	AT2G17770	OsbZIP20	LOC_Os02g16680
AcobZIP21	Aco007847.1	LG21	10050528	10053782	326	34.866	9.61	ATbZIP28	AT3G10800	OsbZIP21	LOC_Os02g33560
AcobZIP22	Aco007958.1	LG21	9258618	9262943	342	38.483	8.78	ATbZIP29	AT4G38900	OsbZIP22	LOC_Os02g49560
AcobZIP23	Aco008303.1	LG19	9302156	9307197	360	38.823	5.49	ATbZIP3	AT5G15830	OsbZIP23	LOC_Os02g52780
AcobZIP24	Aco009346.1	LG22	7765138	7766118	188	21.014	9.82	ATbZIP30	AT2G21230	OsbZIP24	LOC_Os02g58670
AcobZIP25	Aco009353.1	LG22	7680666	7683819	280	29.744	6.26	ATbZIP31	AT2G13150	OsbZIP25	LOC_Os03g03550
AcobZIP26	Aco009751.1	LG10	132499	138929	160	17.668	9.97	ATbZIP33	AT2G12900	OsbZIP26	LOC_Os03g13614
AcobZIP27	Aco010387.1	LG03	1784077	1793616	251	27.788	6.19	ATbZIP34	AT2G42380	OsbZIP27	LOC_Os03g19370
AcobZIP28	Aco010389.1	LG03	1793707	1794144	145	15.318	6.26	ATbZIP35	AT1G49720	OsbZIP28	LOC_Os03g20310
AcobZIP29	Aco010661.1	LG10	2470165	2472860	279	30.667	5.83	ATbZIP37	AT4G34000	OsbZIP29	LOC_Os03g20650
AcobZIP30	Aco012631.1	LG13	3002840	3005552	275	29.926	5.85	ATbZIP38	AT3G19290	OsbZIP30	LOC_Os03g21800
AcobZIP31	Aco013098.1	LG25	615719	617855	281	30.805	6.85	ATbZIP39	AT2G36270	OsbZIP31	LOC_Os03g47200
AcobZIP32	Aco013189.1	LG24	354517	362752	400	42.682	6.48	ATbZIP4	AT1G59530	OsbZIP32	LOC_Os03g56010
AcobZIP33	Aco014284.1	LG05	255327	258400	123	14.249	10.2	ATbZIP40	AT1G03970	OsbZIP33	LOC_Os03g58250
AcobZIP34	Aco014967.1	LG04	11118638	11122313	673	71.643	7.28	ATbZIP41	AT4G36730	OsbZIP34	LOC_Os03g59460
AcobZIP35	Aco015030.1	LG04	11948543	11950083	210	21.991	10.09	ATbZIP42	AT3G30530	OsbZIP35	LOC_Os04g10260
AcobZIP36	Aco015334.1	LG20	10593465	10599337	381	42.648	7.72	ATbZIP43	AT5G38800	OsbZIP36	LOC_Os04g41820
AcobZIP37	Aco015663.1	LG19	644628	650945	426	47.718	7.79	ATbZIP44	AT1G75390	OsbZIP37	LOC_Os04g54474
AcobZIP38	Aco015692.1	LG19	315381	318576	327	35.57	4.66	ATbZIP45	AT3G12250	OsbZIP38	LOC_Os05g03860
AcobZIP39	Aco015974.1	LG22	617444	629500	635	68.161	5.38	ATbZIP46	AT1G68640	OsbZIP39	LOC_Os05g34050
AcobZIP40	Aco016512.1	LG11	428233	430819	186	20.866	9.93	ATbZIP47	AT5G65210	OsbZIP40	LOC_Os05g36160
AcobZIP41	Aco016587.1	LG08	10140243	10144124	492	53.072	6.04	ATbZIP48	AT2G04038	OsbZIP41	LOC_Os05g37170
AcobZIP42	Aco016723.1	LG17	375338	384284	413	46.039	6.71	ATbZIP49	AT3G56660	OsbZIP42	LOC_Os05g41070
AcobZIP43	Aco016741.1	LG17	520274	523946	416	45.914	8.9	ATbZIP5	AT3G49760	OsbZIP43	LOC_Os05g41280
AcobZIP44	Aco017113.1	LG14	11497757	11509929	424	46.769	6.15	ATbZIP50	AT1G77920	OsbZIP44	LOC_Os05g41540
AcobZIP45	Aco017997.1	LG01	20687686	20696405	298	33.016	9.77	ATbZIP51	AT1G43700	OsbZIP45	LOC_Os05g49420
AcobZIP46	Aco017998.1	LG01	20677822	20682649	410	44.171	6.44	ATbZIP52	AT1G06850	OsbZIP46	LOC_Os06g10880
AcobZIP47	Aco018079.1	LG11	8594861	8599360	275	29.827	5.67	ATbZIP53	AT3G62420	OsbZIP47	LOC_Os06g15480
AcobZIP48	Aco020565.1	LG10	12766709	12767182	157	17.257	6.96	ATbZIP54	AT4G01120	OsbZIP48	LOC_Os06g39960
AcobZIP49	Aco021677.1	LG07	10537384	10547681	522	57.054	10.26	ATbZIP55	AT2G46270	OsbZIP49	LOC_Os06g41100
AcobZIP50	Aco023735.1	LG12	7417630	7418236	162	17.614	8.42	ATbZIP56	AT5G11260	OsbZIP50	LOC_Os06g41770
AcobZIP51	Aco024142.1	LG20	2167163	2171023	206	23.314	9.51	ATbZIP57	AT5G10030	OsbZIP51	LOC_Os06g42690
AcobZIP52	Aco026062.1	LG06	3491913	3497183	124	13.731	8.71	ATbZIP58	AT1G13600	OsbZIP52	LOC_Os06g45140
AcobZIP53	Aco027121.1	LG01	18244120	18247388	392	42.469	5.85	ATbZIP59	AT2G31370	OsbZIP53	LOC_Os06g50310
AcobZIP54	Aco027928.1	scaffold_1613	8827	15317	162	18.058	10.04	ATbZIP6	AT2G22850	OsbZIP54	LOC_Os06g50480
AcobZIP55	Aco028599.1	LG13	5171495	5172187	230	25.141	5.79	ATbZIP60	AT1G42990	OsbZIP55	LOC_Os06g50600
AcobZIP56	Aco029130.1	scaffold_2165	1698	7287	419	45.155	9.03	ATbZIP61	AT3G58120	OsbZIP56	LOC_Os06g50830
AcobZIP57	Aco029477.1	LG09	6090774	6117695	430	45.973	6.21	ATbZIP62	AT1G19490	OsbZIP57	LOC_Os07g03220
								ATbZIP63	AT5G28770	OsbZIP58	LOC_Os07g08420
								ATbZIP64	AT3G17609	OsbZIP59	LOC_Os07g10890
								ATbZIP65	AT5G06839	OsbZIP60	LOC_Os07g44950
								ATbZIP66	AT3G56850	OsbZIP61	LOC_Os07g48180
								ATbZIP67	AT3G44460	OsbZIP62	LOC_Os07g48660
								ATbZIP68	AT1G32150	OsbZIP63	LOC_Os07g48820
								ATbZIP69	AT1G06070	OsbZIP64	LOC_Os08g07970
								ATbZIP7	AT4G37730	OsbZIP65	LOC_Os08g26880
								ATbZIP70	AT5G60830	OsbZIP66	LOC_Os08g36790
								ATbZIP71	AT2G24340	OsbZIP67	LOC_Os08g38020
								ATbZIP72	AT5G07160	OsbZIP68	LOC_Os08g43090
								ATbZIP74	AT2G21235	OsbZIP69	LOC_Os08g43600
								ATbZIP75	AT5G08141	OsbZIP70	LOC_Os09g10840
								ATbZIP8	AT1G68880	OsbZIP71	LOC_Os09g13570
								ATbZIP9	AT5G24800	OsbZIP72	LOC_Os09g28310
										OsbZIP73	LOC_Os09g29820
										OsbZIP74	LOC_Os09g31390
										OsbZIP75	LOC_Os09g34060
										OsbZIP76	LOC_Os09g34880
										OsbZIP77	LOC_Os09g36910
										OsbZIP78	LOC_Os10g38820
										OsbZIP79	LOC_Os11g05480
										OsbZIP80	LOC_Os11g05640
										OsbZIP81	LOC_Os11g06170
										OsbZIP82	LOC_Os11g11100
										OsbZIP83	LOC_Os12g05680
										OsbZIP84	LOC_Os12g06520
										OsbZIP85	LOC_Os12g09250
										OsbZIP86	LOC_Os12g13170
										OsbZIP87	LOC_Os12g37410
										OsbZIP88	LOC_Os12g40920
										OsbZIP89	LOC_Os12g43790
