# Supplementary material for: Genome-Wide Analysis, Characterization, and Expression Profile of the Basic Leucine Zipper Transcription Factor Family in Pineapple
Source: Int J Genomics. 2020 May 11;2020:3165958. doi: 10.1155/2020/3165958 (PMC7238347; doi:10.1155/2020/3165958)
Supplement: Supplementary 3 — Table S2: synteny blocks of bZIP genes within pineapple. [file 3165958.f3.xlsx]

## Sheet: Sheet1
Table S2. Synteny blocks of bZIP genes within pineapple.
Gene1	Gene2	Name1	Name2	Ks	Ka	Ka/Ks
Aco001064.1	Aco001737.1	AcobZIP2	AcobZIP7	2.4266	0.2203	0.0907855
Aco001064.1	Aco006270.1	AcobZIP2	AcobZIP16	5.5246	0.1976	0.0357673
Aco001064.1	Aco007216.1	AcobZIP2	AcobZIP18	2.0851	0.2129	0.102105
Aco001064.1	Aco016723.1	AcobZIP2	AcobZIP42	2.844	0.4409	0.155028
Aco001167.1	Aco016723.1	AcobZIP3	AcobZIP42	4.2043	0.5004	0.119021
Aco001737.1	Aco006270.1	AcobZIP7	AcobZIP16	1.0541	0.0964	0.0914524
Aco001737.1	Aco007216.1	AcobZIP7	AcobZIP18	1.3915	0.1677	0.120517
Aco001737.1	Aco016723.1	AcobZIP7	AcobZIP42	3.3529	0.4362	0.130096
Aco004337.1	Aco010661.1	AcobZIP12	AcobZIP29	1.1226	0.2105	0.187511
Aco006270.1	Aco007216.1	AcobZIP16	AcobZIP18	1.4101	0.1091	0.0773704
Aco006270.1	Aco016723.1	AcobZIP16	AcobZIP42	4.0907	0.3602	0.0880534
Aco007192.1	Aco012631.1	AcobZIP17	AcobZIP30	1.6117	0.2695	0.167215
Aco007216.1	Aco016723.1	AcobZIP18	AcobZIP42	4.2371	0.3971	0.0937198
Aco009751.1	Aco014284.1	AcobZIP26	AcobZIP33	3.0213	0.1686	0.0558038
Aco009751.1	Aco027928.1	AcobZIP26	AcobZIP54	0.1244	0.0344	0.276527
Aco010661.1	Aco018079.1	AcobZIP29	AcobZIP47	2.1498	0.2299	0.10694
Aco013189.1	Aco015974.1	AcobZIP32	AcobZIP39	0.6489	0.1708	0.263215
Aco013189.1	Aco029130.1	AcobZIP32	AcobZIP56	0.0794	0.073	0.919395
Aco014284.1	Aco027928.1	AcobZIP33	AcobZIP54	3.1003	0.253	0.081605
Aco015334.1	Aco015663.1	AcobZIP36	AcobZIP37	1.3373	0.2048	0.153144
Aco015334.1	Aco016723.1	AcobZIP36	AcobZIP42	2.1328	0.4614	0.216335
Aco015663.1	Aco016723.1	AcobZIP37	AcobZIP42	4.2065	0.4658	0.110733
Aco015663.1	Aco017113.1	AcobZIP37	AcobZIP44	0.8395	0.2776	0.330673
Aco015974.1	Aco029130.1	AcobZIP39	AcobZIP56	0.7206	0.1967	0.272967
