# Supplementary material for: Genome-Wide Analysis, Characterization, and Expression Profile of the Basic Leucine Zipper Transcription Factor Family in Pineapple
Source: Int J Genomics. 2020 May 11;2020:3165958. doi: 10.1155/2020/3165958 (PMC7238347; doi:10.1155/2020/3165958)
Supplement: Supplementary 4 — Table S3: synteny blocks of bZIP genes between pineapple and Arabidopsis. [file 3165958.f4.xlsx]

## Sheet: Sheet1
Table S3.Synteny blocks of bZIP genes between pineapple and Arabidopsis.
Gene1	Gene2	Name1	Name2	Ks	Ka	Ka/Ks
Aco000921.1	AT3G19290	AcobZIP1	ATbZIP38	3.6038	1.1627	0.322632
Aco001326.1	AT2G17770	AcobZIP4	ATbZIP27	3.6527	0.8024	0.219673
Aco001636.1	AT1G06850	AcobZIP5	ATbZIP52	4.0976	0.4031	0.0983747
Aco001707.1	AT2G17770	AcobZIP6	ATbZIP27	3.705	0.8137	0.219622
Aco001737.1	AT3G12250	AcobZIP7	ATbZIP45	4.1285	0.2154	0.0521739
Aco003049.1	AT3G19290	AcobZIP10	ATbZIP38	2.9489	1.2564	0.426057
Aco007216.1	AT3G12250	AcobZIP18	ATbZIP45	1.9981	0.2099	0.10505
Aco009346.1	AT2G17770	AcobZIP24	ATbZIP27	3.7139	0.7902	0.212768
Aco010389.1	AT3G56850	AcobZIP28	ATbZIP66	3.5254	1.1575	0.328332
Aco010389.1	AT2G41070	AcobZIP28	ATbZIP12	3.493	0.9155	0.262096
Aco010389.1	AT4G34000	AcobZIP28	ATbZIP37	3.5267	0.8768	0.248618
Aco015030.1	AT2G17770	AcobZIP35	ATbZIP27	3.7372	0.9213	0.246521
Aco015030.1	AT3G19290	AcobZIP35	ATbZIP38	1.8469	0.8259	0.447182
Aco016512.1	AT5G08141	AcobZIP40	ATbZIP75	99	1.0452	0.0105576
Aco027121.1	AT2G17770	AcobZIP53	ATbZIP27	3.6147	0.8147	0.225385
Aco027121.1	AT4G36730	AcobZIP53	ATbZIP41	3.9109	1.2597	0.3221
