# Supplementary material for: Genome-Wide Analysis, Characterization, and Expression Profile of the Basic Leucine Zipper Transcription Factor Family in Pineapple
Source: Int J Genomics. 2020 May 11;2020:3165958. doi: 10.1155/2020/3165958 (PMC7238347; doi:10.1155/2020/3165958)
Supplement: Supplementary 5 — Table S4: synteny blocks of bZIP genes between pineapple and rice. [file 3165958.f5.xlsx]

## Sheet: Sheet1
Table S4. Synteny blocks of bZIP genes between pineapple and rice.
Gene1	Gene2	Name1	Name2	Ks	Ka	Ka/Ks
Aco014284.1	LOC_Os01g07880	AcobZIP33	OsbZIP01	3.069	0.3212	0.104659
Aco004337.1	LOC_Os01g11350	AcobZIP12	OsbZIP02	2.1129	0.3424	0.162052
Aco009353.1	LOC_Os01g58760	AcobZIP25	OsbZIP07	3.5146	0.5978	0.17009
Aco015030.1	LOC_Os01g59760	AcobZIP35	OsbZIP09	1.9889	0.5147	0.258786
Aco010389.1	LOC_Os02g03960	AcobZIP28	OsbZIP14	3.2365	1.0135	0.313147
Aco009751.1	LOC_Os02g10860	AcobZIP26	OsbZIP18	3.2952	0.1294	0.0392692
Aco014284.1	LOC_Os02g10860	AcobZIP33	OsbZIP18	3.1988	0.2586	0.0808428
Aco027928.1	LOC_Os02g10860	AcobZIP54	OsbZIP18	3.2889	0.136	0.0413512
Aco010389.1	LOC_Os02g49560	AcobZIP28	OsbZIP22	3.4748	1.5802	0.45476
Aco001636.1	LOC_Os03g03550	AcobZIP5	OsbZIP25	4.002	0.6528	0.163118
Aco009346.1	LOC_Os03g20650	AcobZIP24	OsbZIP29	3.489	0.8509	0.243881
Aco010389.1	LOC_Os03g20650	AcobZIP28	OsbZIP29	3.3656	0.9042	0.268659
Aco015030.1	LOC_Os03g20650	AcobZIP35	OsbZIP29	3.6709	0.5895	0.160587
Aco002544.1	LOC_Os03g59460	AcobZIP9	OsbZIP34	3.3579	1.1048	0.329015
Aco008303.1	LOC_Os03g59460	AcobZIP23	OsbZIP34	2.4111	1.5505	0.643067
Aco018079.1	LOC_Os03g59460	AcobZIP47	OsbZIP34	3.86	1.2083	0.313031
Aco010389.1	LOC_Os05g41070	AcobZIP28	OsbZIP42	3.5359	0.9274	0.262281
Aco015030.1	LOC_Os05g41070	AcobZIP35	OsbZIP42	3.3896	0.4338	0.12798
Aco024142.1	LOC_Os05g41070	AcobZIP51	OsbZIP42	3.5908	0.5798	0.161468
Aco013098.1	LOC_Os05g41540	AcobZIP31	OsbZIP44	2.5789	0.5609	0.217496
Aco014284.1	LOC_Os06g39960	AcobZIP33	OsbZIP48	2.2694	0.2297	0.101216
Aco003175.1	LOC_Os07g48180	AcobZIP11	OsbZIP61	2.2099	0.7138	0.323001
Aco009346.1	LOC_Os07g48660	AcobZIP24	OsbZIP62	3.4822	0.7533	0.216329
Aco024142.1	LOC_Os08g36790	AcobZIP51	OsbZIP66	3.5778	0.6304	0.176198
Aco000921.1	LOC_Os08g38020	AcobZIP1	OsbZIP67	3.4286	0.5076	0.148049
Aco003049.1	LOC_Os08g38020	AcobZIP10	OsbZIP67	3.4656	0.5114	0.147565
Aco010389.1	LOC_Os08g38020	AcobZIP28	OsbZIP67	3.3401	1.016	0.304183
Aco004337.1	LOC_Os08g43090	AcobZIP12	OsbZIP68	2.9988	0.7385	0.246265
Aco010661.1	LOC_Os08g43090	AcobZIP29	OsbZIP68	3.4224	0.9058	0.264668
Aco017998.1	LOC_Os08g43090	AcobZIP46	OsbZIP68	4.1171	0.6195	0.15047
Aco010389.1	LOC_Os09g28310	AcobZIP28	OsbZIP72	3.4453	0.7447	0.21615
Aco015030.1	LOC_Os09g28310	AcobZIP35	OsbZIP72	2.1643	0.6131	0.283279
Aco010389.1	LOC_Os09g29820	AcobZIP28	OsbZIP73	3.336	1.5442	0.46289
Aco007958.1	LOC_Os09g36910	AcobZIP22	OsbZIP77	3.5548	0.9445	0.265697
Aco010389.1	LOC_Os09g36910	AcobZIP28	OsbZIP77	3.1903	0.7561	0.237
Aco016723.1	LOC_Os11g05480	AcobZIP42	OsbZIP79	3.5472	0.2206	0.0621899
Aco016723.1	LOC_Os12g05680	AcobZIP42	OsbZIP80	3.8317	0.2544	0.0663935
Aco016587.1	LOC_Os12g06520	AcobZIP41	OsbZIP84	4.1641	0.5424	0.130256
Aco017997.1	LOC_Os12g06520	AcobZIP45	OsbZIP84	4.0289	0.8118	0.201494
Aco017998.1	LOC_Os12g06520	AcobZIP46	OsbZIP84	4.0257	0.5538	0.137566
Aco020565.1	LOC_Os12g43790	AcobZIP48	OsbZIP89	3.2859	0.7583	0.230774
