# Supplementary material for: Genome-Wide Analysis, Characterization, and Expression Profile of the Basic Leucine Zipper Transcription Factor Family in Pineapple
Source: Int J Genomics. 2020 May 11;2020:3165958. doi: 10.1155/2020/3165958 (PMC7238347; doi:10.1155/2020/3165958)
Supplement: Supplementary 6 — Table S5: the expression profiles of the pineapple bZIP genes in different tissues. [file 3165958.f6.xlsx]

## Sheet: Sheet1
Table S5. The expression profiles of the pineapple bZIP genes in different tissues.
gene_id	Ovule.S1	Ovule.S2	Ovule.S3	Ovule.S4	Ovule.S5	Ovule.S6	Ovule.S7	Sepal.S1	Sepal.S2	Sepal.S3	Sepal.S4	Stamen.S1	Stamen.S2	Stamen.S3	Stamen.S4	Stamen.S5	Petal.S1	Petal.S2	Petal.S3	fruit.S1	fruit.S2	fruit.S3	fruit.S4	fruit.S5	fruit.S6	Root	Flower	Leaf
AcobZIP1	1.5302	0.940751	0.234277	0.232952	0.682894	0	0.655452	5.90397	5.82142	0.621086	0.205315	0.0781965	0.308034	0	0.396163	0.0967659	0.992476	0	8.30186	0	0	0.419022	9.40203	4.03037	1.19223	10.0873	2.57218	3.26001
AcobZIP2	2.63687	4.29643	3.75915	2.20785	3.63703	4.22833	6.85342	2.06183	1.26353	2.09868	2.84949	74.892	30.7679	16.314	17.1095	3.08324	10.7785	2.8273	0.550703	10.7826	8.02112	6.54664	5.3594	7.48727	11.4854	3.61263	0.149803	0.3579
AcobZIP3	3.76751	5.67324	5.09107	3.99125	4.80203	5.37439	8.3409	4.75037	3.63803	13.2552	12.5965	8.88504	8.06908	5.45323	5.07022	10.2399	5.05523	1.0017	22.8751	34.9976	29.4831	25.2648	34.7616	36.2662	70.3111	54.4159	5.92811	6.0888
AcobZIP4	18.1847	16.0034	9.99523	7.67158	7.78392	35.8077	13.3892	1.90903	2.18173	6.16704	3.89428	10.5646	9.02391	14.3585	18.7921	20.7256	8.37369	6.1829	15.0539	7.75269	4.94504	3.46872	3.07755	3.94795	15.7072	13.5524	7.29927	8.47433
AcobZIP5	37.9256	35.8738	43.318	36.64	36.4079	34.5354	36.1597	28.2462	24.0423	22.7055	22.9667	36.3366	30.5994	21.9277	19.3103	87.9322	17.8075	20.3672	11.3897	4.41702	6.15078	7.1904	8.11994	7.35293	5.48778	14.0836	54.9163	57.5927
AcobZIP6	4.22301	3.96493	4.21793	3.5971	2.80589	1.93753	5.21728	2.27268	2.85771	1.1426	0.747904	4.82256	5.99469	3.65954	4.10066	4.42233	6.57478	5.88542	0	1.51306	3.13876	3.48261	2.77086	1.94122	1.74284	9.67555	0.606107	1.08158
AcobZIP7	54.7786	51.0701	46.3201	41.2176	42.2542	62.8089	45.8887	28.5044	29.994	36.9204	34.975	34.2515	27.2618	26.361	29.1995	32.3419	23.3373	17.3388	36.9414	67.2641	49.9089	45.2681	36.6441	34.8273	56.3307	46.3007	25.9615	24.9618
AcobZIP8	4.9613	8.32644	7.52582	4.98774	8.33753	7.10583	10.9843	9.64967	9.89475	11.6348	12.3933	1.97236	3.71592	7.8026	6.98596	5.59773	6.21087	6.48147	13.4129	35.0536	18.4666	16.2651	15.0197	11.998	18.3895	28.8752	11.195	7.36289
AcobZIP9	15.2793	11.4646	12.6513	8.89095	13.7967	15.8815	14.7441	89.2516	106.514	40.2742	51.1581	21.2031	20.0957	22.7696	22.1548	33.2367	22.8638	36.4578	112.584	126.903	113.568	214.872	85.6953	44.2428	74.6177	102.476	97.9631	108.835
AcobZIP10	0.2456	0.948892	0.195548	0.195553	0.192729	0.197872	0.685925	0.190717	0	0.63733	2.033	0	0.208092	0.278696	0.533544	1.37684	0.315367	0	1.25359	1.71073	1.88412	2.16983	8.94828	14.884	24.3638	2.62244	0.597978	1.11729
AcobZIP11	10.5933	8.43527	9.49513	10.2175	9.85379	5.78662	6.34449	4.18095	5.9795	5.24382	4.43682	5.03479	5.65317	4.37698	5.02205	5.11772	2.01546	2.47504	6.63342	4.78266	8.36651	8.33744	10.2869	10.8331	12.9245	6.76594	5.60235	4.8313
AcobZIP12	0.149396	0.0373611	0	0.136547	0.135294	0	0.116391	0.236689	0.510665	0.408452	0	0	0.0524325	0	0	0.0717043	0	0.246641	0	0	0	0	0	0	0	0.814604	2.00784	2.48839
AcobZIP13	0.515269	0.560691	0.470227	0	2.3538	0.489389	0	2.39022	0	3.3034	0.978944	0	0.630941	3.71223	0.794681	2.8403	0	0	0	0.412974	2.10827	1.04225	12.1718	21.5786	63.4678	5.29716	1.79799	3.68543
AcobZIP14	16.8862	17.2279	15.866	16.4637	15.4211	16.1063	11.0516	14.3664	19.7554	13.0268	8.99761	14.6707	13.0729	13.1554	13.3281	12.7535	9.07764	12.5769	36.6744	9.56104	13.7586	12.955	24.5769	27.2032	24.5328	24.5489	24.6617	29.2014
AcobZIP15	88.5478	90.4849	56.3883	56.8284	52.1716	169.544	59.2779	35.8208	39.8652	43.745	50.6095	107.712	71.5457	57.1083	68.5679	111.958	33.0938	29.5589	54.2302	173.402	130.614	79.546	50.7195	62.9101	102.61	37.06	28.7221	25.7704
AcobZIP16	32.1489	29.8042	24.1024	26.1957	24.1023	27.8287	18.1759	14.8353	17.8672	16.7225	14.0673	17.6395	15.798	12.1546	16.3305	11.7269	11.795	13.5132	17.4216	10.6717	10.6776	9.57871	12.1191	15.2104	14.3759	19.2415	16.186	16.6532
AcobZIP17	27.4734	22.5098	21.6823	22.4434	21.024	17.59	18.6385	17.6778	20.2645	19.1547	17.5209	19.4879	23.0545	38.0036	25.5919	23.0645	12.5989	15.8477	11.8082	21.0039	22.5401	24.8102	15.0576	15.3924	14.9198	16.3669	13.997	13.8271
AcobZIP18	23.8911	30.7346	25.9156	19.0842	21.1346	32.57	31.0851	37.415	40.1718	36.2304	34.6454	33.5511	27.7514	20.1412	26.3842	29.4102	24.6224	20.1661	36.7441	56.4838	45.7053	38.8468	41.4165	27.1372	41.6792	45.7726	15.8549	16.4089
AcobZIP19	18.8496	19.4251	20.1879	15.3196	15.9873	18.2993	16.9838	86.2577	63.7253	66.5991	44.8985	30.3494	29.1689	41.6276	35.3173	16.0532	20.646	14.376	100.365	169.548	70.0919	91.5431	94.7445	39.625	62.4502	104.286	39.8971	44.7681
AcobZIP20	53.2475	48.0025	50.2985	44.0398	42.3958	43.8211	48.4232	13.2536	6.25825	5.37585	8.60736	144.251	157.53	120.278	58.6759	7.0434	19.4103	7.2994	1.9273	2.47044	2.86154	1.479	1.19279	0.239712	0.0774345	5.71889	4.94852	3.46265
AcobZIP21	18.3828	16.1459	14.9902	10.3025	10.0081	13.2961	12.7858	20.2904	25.4624	17.4816	16.0664	16.9119	15.0237	19.5831	19.9093	11.5034	8.06232	8.75459	39.0497	15.2346	16.0594	17.8375	23.3367	20.6184	36.4982	29.2139	13.2664	12.9346
AcobZIP22	47.648	43.1772	36.3246	45.3874	45.9889	47.6502	44.549	26.4219	24.3743	27.0058	27.8874	35.3002	32.153	39.7586	37.725	96.3961	23.9921	29.8763	47.1841	21.4843	28.1175	20.6755	16.0188	17.2848	15.1217	30.6688	89.5835	82.4692
AcobZIP23	2.35237	7.7921	12.7209	13.8051	17.3438	22.4525	27.8563	46.8833	75.2568	75.7213	63.3651	4.51868	13.8429	24.5875	42.2019	31.5948	16.3849	43.8351	39.8647	35.8647	42.9722	51.1913	105.118	157.701	194.845	86.2824	60.5799	62.1096
AcobZIP24	2.96553	3.08962	0.382801	0.19226	0.571876	0.586972	0.168834	0.181079	0.1997	0.156382	0.307002	1.07458	0.1874	0.963414	0.393873	0.0531281	0.153015	0.187686	0.242834	1.26785	2.3367	1.08072	0	0.168697	0.0929461	12.5107	0	0
AcobZIP25	32.5249	31.1518	27.7509	27.7	29.749	28.8156	24.7829	16.4967	16.8217	14.5037	13.6947	23.8186	21.5165	16.3625	19.986	17.5921	12.0139	11.9637	10.4842	10.9952	17.9943	17.8833	14.3323	11.4623	13.489	14.1125	11.5395	11.0529
AcobZIP26	6.6912	6.76563	6.92755	10.1187	9.16762	8.56795	10.7875	2.34262	1.55139	3.12428	2.13503	0.848132	0.986766	0.581515	1.34489	4.54001	1.39066	2.68093	6.16777	1.5045	1.17227	0.839938	0.847947	0.210821	0.715808	1.75779	3.5081	2.93611
AcobZIP27	0.0517375	0.0500945	0	0	0.0814734	0.0846489	0	0	0	0	0	0	0.08811	0	0	0	0	0	0	0	0	0	0	0	0	0	0	0
AcobZIP28	5.15759	3.4797	1.02064	3.06056	2.50958	4.23548	5.67966	0.964353	1.55453	0.404794	0.402331	4.63393	4.64424	4.74981	4.50796	0	0.808166	0.998766	0	0	0	0	0	0	0	0	0.285574	0
AcobZIP29	1.27023	2.03343	3.63891	3.43036	5.0451	3.12068	5.80816	5.84596	5.16569	2.98566	3.19066	10.3648	13.5935	22.8724	14.5801	27.288	23.8776	50.6685	4.55871	0.13158	0.807388	0.461472	0.234547	0.146949	0	37.9408	76.5329	83.0496
AcobZIP30	18.7479	15.5523	12.8758	14.6104	15.6167	19.2471	15.3615	8.40327	11.1588	9.82801	9.60675	12.7275	11.7134	14.1445	16.4575	5.69005	12.2334	9.45693	4.73695	12.7623	7.1983	8.53208	5.43367	6.92784	5.60635	15.2443	6.23393	6.59375
AcobZIP31	15.7271	16.5221	16.4797	15.3764	13.7701	18.8441	17.7218	8.07898	7.11541	8.05885	6.45846	10.0307	8.25905	10.203	9.24269	12.97	6.46374	5.24331	10.7225	8.12353	7.38325	6.0645	10.2154	6.59472	14.5524	12.9703	7.07793	7.41614
AcobZIP32	18.0846	17.9993	15.8221	17.1784	16.7372	23.6951	18.0052	8.14347	7.77732	8.26995	9.32852	14.7141	14.2317	11.4354	13.5795	13.2728	6.75412	6.19098	7.94664	7.95588	7.24893	6.78515	5.65977	7.88968	6.66172	7.47299	5.34396	5.65648
AcobZIP33	1.69475	1.92206	3.55343	1.25319	1.03856	0.482585	0.938352	6.37457	5.16397	19.4105	10.2278	0.964251	0.625771	0.126178	0.43319	6.9217	5.13651	17.3372	244.063	0.895074	0	0	0	0	0.0732498	53.5394	96.6132	98.0133
AcobZIP34	53.6893	47.058	45.1737	44.73	40.1286	51.3904	45.2822	25.8407	28.5442	36.2919	36.2521	43.5006	36.4079	49.3755	51.4906	47.578	22.6282	21.5915	40.6305	20.0984	30.7534	23.2646	26.6816	31.9588	36.3405	27.0128	57.8511	51.0051
AcobZIP35	1.9721	1.57054	1.62017	1.12695	1.12527	1.81587	1.03101	1.24132	1.20203	2.03768	1.49448	0.935217	1.34566	1.21277	1.43419	0.949124	0.784789	0.530395	9.68569	3.96783	2.72638	2.92684	1.1881	1.3525	1.43709	7.53378	4.22634	5.30402
AcobZIP36	0.867093	0.924416	0.925935	0.693712	1.10091	0.193068	0.261696	0.203634	0.0884565	0.388983	0.244522	164.064	80.2325	68.3937	103.595	154.778	0.0666582	0	0	0	0.0364931	0	0	0	0	25.1856	0.297315	0.254215
AcobZIP37	0.211794	0.261454	0.455029	0.164815	0.562077	0.249916	0.929634	0.575179	0.668874	0.65755	0.622357	0.76747	2.74073	8.47975	19.0024	15.0952	0.290915	0.0880114	1.7403	0.180216	0.121317	0.124804	0.738157	1.34724	1.11099	36.7056	1.30566	1.42986
AcobZIP38	66.6285	84.334	94.3815	69.5115	77.8177	117.349	100.111	109.362	83.5996	49.2496	48.3076	58.4185	86.8789	152.389	114.497	122.583	90.9036	53.1536	63.114	134.944	133.32	143.507	64.0833	66.6832	104.973	71.966	104.272	113.396
AcobZIP39	29.5849	27.8873	26.484	29.7656	27.9804	26.5318	26.7764	16.6293	17.1485	14.5921	14.9776	26.6003	26.3179	22.8892	22.605	17.7121	10.7753	6.78516	6.30725	22.3886	15.9078	15.7024	11.2978	12.5548	11.2909	21.9621	7.29643	7.2167
AcobZIP40	2.67637	2.29868	5.12816	3.5085	3.01752	8.15248	3.00747	8.18283	7.21483	6.72195	4.98158	6.02972	6.58438	9.73742	15.2194	10.3173	1.83594	0.835946	5.62789	9.76315	17.9099	11.9395	10.5286	16.2547	72.6197	13.0417	0.737673	0.990437
AcobZIP41	4.75452	4.86918	4.70312	2.9842	4.50418	11.6914	8.15806	16.9505	15.4451	5.97027	7.77431	13.7611	8.12088	9.40458	6.61454	8.09262	14.0476	15.6814	6.20526	9.05506	21.1826	18.0364	7.0158	6.45752	7.05674	4.01818	6.66686	8.16421
AcobZIP42	1.09368	1.92977	2.46176	1.12842	1.55312	1.10338	3.08266	2.95233	6.03319	6.69393	8.05385	152.869	86.5961	64.9167	65.58	26.0783	5.30605	1.39935	1.60225	12.8136	10.054	5.05353	7.09044	4.82911	5.63536	59.4537	2.09019	2.20211
AcobZIP43	4.44051	2.90744	3.1809	2.0515	1.73358	4.93999	2.62173	0.244231	0.367425	0.465513	0.585508	5.13264	7.58802	7.36231	1.77594	4.28441	0.12128	0.145531	0.188653	0	0.151814	0.0524625	0.073385	0	0.312941	0.15437	0.434288	0.150966
AcobZIP44	3.48965	4.44816	3.15667	3.95775	4.36403	2.12476	3.18981	1.78334	2.9169	2.61984	2.32935	3.18187	3.07569	3.89668	4.69599	9.18251	1.41379	1.43727	1.5275	0.564761	0.211103	0.526388	0.47672	0.653973	1.08481	21.1393	1.33866	0.605601
AcobZIP45	10.9161	14.4942	13.7624	11.2253	11.2484	14.9724	11.52	6.66048	6.94785	6.99673	4.75031	8.21954	6.0487	7.40109	8.40627	7.15809	7.21708	6.55855	3.06045	4.7928	3.83082	2.74272	3.53332	4.08909	4.68529	6.15556	6.68548	5.33671
AcobZIP46	61.6402	49.763	51.1101	49.2484	50.1851	79.2028	45.3088	23.717	24.4511	20.2165	21.6519	47.5633	41.3623	32.728	26.6099	44.8567	20.2004	15.4603	12.006	26.8199	28.9125	27.628	16.5898	18.647	15.4274	12.7517	13.5866	14.307
AcobZIP47	0.643228	1.62863	2.72574	2.53853	3.71276	0.928254	3.77204	5.8913	2.60247	1.55589	2.58193	0.956171	1.56064	3.25064	2.37863	18.0591	12.6332	7.04439	1.30474	0.132773	0	0.0871555	0.0620548	0.190694	0.0509829	1.75266	22.945	21.4925
AcobZIP48	28.7002	65.6651	94.3732	69.1241	80.8216	101.61	109.102	10.1792	6.10264	6.86378	8.41297	18.4417	25.9985	29.555	40.2152	35.032	10.4896	8.86449	22.8115	41.5801	72.5275	36.3171	119.045	95.0997	76.7916	110.107	22.8313	21.0852
AcobZIP49	22.8405	21.2245	20.4652	19.5754	22.4616	41.3276	24.2622	15.3891	22.5613	16.9552	20.3025	16.3594	12.9869	14.5701	14.3474	16.4893	13.9038	11.5786	4.61947	4.46002	17.1684	16.7138	14.2059	16.7112	15.777	8.72107	8.8052	9.87314
AcobZIP50	23.3889	41.8868	46.1964	28.6056	35.7574	25.2649	38.2632	70.9836	87.7666	83.2606	58.7543	51.6387	25.8102	16.9208	26.6669	42.2437	15.8138	53.2752	68.7252	64.0504	64.0285	56.9359	94.9092	69.9335	149.618	67.653	45.269	50.6247
AcobZIP51	3.60193	3.64141	2.65388	3.5752	3.54771	3.21727	2.83587	3.31815	3.62973	2.35888	2.72704	3.26684	3.19512	3.67519	4.26694	6.34173	3.23639	2.79622	2.89528	3.45777	2.53383	2.92528	4.20012	4.35245	4.01101	8.13537	22.3659	23.0458
AcobZIP52	11.9574	9.89394	7.28732	10.9038	9.51926	10.1655	5.62334	8.18098	5.44514	5.68198	6.56402	14.0698	19.1399	21.9087	11.3742	6.09484	3.92896	2.71319	6.13304	12.6276	4.80495	6.16195	4.14923	1.96479	5.51238	7.26435	3.23356	2.83062
AcobZIP53	12.2757	9.91574	8.03818	14.278	13.1825	6.9595	7.02797	5.36601	7.08957	2.69118	3.76512	14.6291	10.0102	8.52414	11.5385	0.818128	5.21452	2.75038	1.97407	0.390002	0.76109	1.4283	2.32563	3.89039	1.90877	0.548077	4.3113	4.14749
AcobZIP54	0.036681	0.0255658	0.0396949	0	0.0392603	0	0.114664	0.081032	0	0.0352815	0	0	0	0	0.0167475	0.0685017	0	0.0406223	0.371496	0	0	0.0406796	0	0	0.0267361	0.0246657	0	0.113774
AcobZIP55	10.4492	9.94804	8.66543	9.07549	8.60597	14.2606	9.41847	3.88655	6.43727	5.12099	5.92613	5.0568	5.84327	7.15778	8.37235	6.42536	4.53816	5.5017	6.09935	4.66618	10.6232	13.5359	9.33712	10.126	11.679	9.15927	4.48271	5.54927
AcobZIP56	15.5681	15.306	13.3401	14.4362	14.8954	20.1827	14.921	5.50982	6.55496	6.02696	6.93633	13.1776	13.1065	9.67696	10.9687	11.1623	5.1912	4.12148	5.95592	5.7211	5.55597	4.15512	4.22077	6.00292	3.59972	5.87329	5.17763	4.12735
AcobZIP57	8.95204	8.71807	9.4408	8.32001	10.0055	5.47317	9.53858	4.85884	5.34943	5.25316	4.85054	9.72265	9.63449	21.9959	15.1882	4.56203	3.26384	4.36324	5.10925	3.21533	2.78834	3.25919	3.09631	5.56295	4.58612	4.49477	5.06312	5.73972
