# Supplementary material for: Genome-Wide Analysis, Characterization, and Expression Profile of the Basic Leucine Zipper Transcription Factor Family in Pineapple
Source: Int J Genomics. 2020 May 11;2020:3165958. doi: 10.1155/2020/3165958 (PMC7238347; doi:10.1155/2020/3165958)
Supplement: Supplementary 7 — Table S6: cis-elements in AcobZIP promoter regions. [file 3165958.f7.xlsx]

## Sheet: Sheet1
Table S6. Cis-elememts in AcobZIP promoters regions.
Gene name	Gene ID	ABRE	AuxRR-core	CGTCA-motif	EIRE	ERE	GARE-motif	GCC-box	HSE	LTR	MBS	TC-rich	TCA-element	TGA-element	W -box	WUN-motif
AcobZIP1	Aco000921.1		1	2		2					2		1
AcobZIP2	Aco001064.1	1				3				2			1	1	1
AcobZIP3	Aco001167.1			1							1	1		1
AcobZIP4	Aco001326.1	2		1		4	1			1		1			1	1
AcobZIP5	Aco001636.1	2				5					1		1			1
AcobZIP6	Aco001707.1	2	1							1		1	1			1
AcobZIP7	Aco001737.1	1				5				1		1	1		1
AcobZIP8	Aco001785.1	1		3		1				2	1		2			2
AcobZIP9	Aco002544.1	5	1	1		1				1			3	1		1
AcobZIP10	Aco003049.1	4		3										2	1	1
AcobZIP11	Aco003175.1	2		2		5				1	1	1	1		1
AcobZIP12	Aco004337.1	4		1		2				1	1			1
AcobZIP13	Aco004970.1	5													1
AcobZIP14	Aco005226.1	2		1		3				1	1				1	2
AcobZIP15	Aco005538.1	3		2		1				3	1	1
AcobZIP16	Aco006270.1	1		2		3				1	1		1
AcobZIP17	Aco007192.1	3		3		2	1						2		1
AcobZIP18	Aco007216.1			2		3						2			1
AcobZIP19	Aco007362.1	1				3					2		2
AcobZIP20	Aco007826.1	1				2				3	1	1				2
AcobZIP21	Aco007847.1					2						1	1			1
AcobZIP22	Aco007958.1	1		1		3								1	1
AcobZIP23	Aco008303.1	7		3		1				4	1		1		1
AcobZIP24	Aco009346.1	2		3									1			2
AcobZIP25	Aco009353.1					3								1
AcobZIP26	Aco009751.1	2		1						3			1	1		1
AcobZIP27	Aco010387.1	4		2		1						2	2	3		3
AcobZIP28	Aco010389.1	3				2						2	2	2	1	5
AcobZIP29	Aco010661.1	2		2		1					1
AcobZIP30	Aco012631.1									1			1			1
AcobZIP31	Aco013098.1	4		3		1					1		1
AcobZIP32	Aco013189.1	5	1	4		5	1						1		2
AcobZIP33	Aco014284.1	7		4		2				1	1				1
AcobZIP34	Aco014967.1	4		6		3				1	1			1
AcobZIP35	Aco015030.1	1				2									3	1
AcobZIP36	Aco015334.1	1					2					1		2	2	1
AcobZIP37	Aco015663.1	3		3		4	1			2					2	1
AcobZIP38	Aco015692.1	1		3		5				2		1			1	2
AcobZIP39	Aco015974.1	2		1		7	1			1		1	1		1
AcobZIP40	Aco016512.1			1		1					2		2		1
AcobZIP41	Aco016587.1	4		3		10				2		1	1	1
AcobZIP42	Aco016723.1		1										1		3
AcobZIP43	Aco016741.1	15		3						1		1		1	1
AcobZIP44	Aco017113.1	5	1	2											1
AcobZIP45	Aco017997.1					13				1			1	1
AcobZIP46	Aco017998.1	6		6		2	1							1
AcobZIP47	Aco018079.1	3		1		4	1			1			1	1		2
AcobZIP48	Aco020565.1	1				1							1			1
AcobZIP49	Aco021677.1	3		1		2				1					2	1
AcobZIP50	Aco023735.1	2		2									1		1	1
AcobZIP51	Aco024142.1	3		9		2				1	1
AcobZIP52	Aco026062.1	7		2		3							1		1
AcobZIP53	Aco027121.1	2		1										1		2
AcobZIP54	Aco027928.1	2		1						3			1	1		1
AcobZIP55	Aco028599.1	2				2	1			1				1	1	2
AcobZIP56	Aco029130.1	2		4		6	1						1		2
AcobZIP57	Aco029477.1	1	1	1		1				2		1	1
