# Supplementary material for: Genome-Wide Analysis, Characterization, and Expression Profile of the Basic Leucine Zipper Transcription Factor Family in Pineapple
Source: Int J Genomics. 2020 May 11;2020:3165958. doi: 10.1155/2020/3165958 (PMC7238347; doi:10.1155/2020/3165958)
Supplement: Supplementary 8 — Table S7: primers used in qRT-PCR analysis. [file 3165958.f8.xlsx]

## Sheet: Sheet1
Table S7. Primers used in qRT-PCR analysis.
Gene name	F	R
Q-AcobZIP5	AGCCTGGGTGAGACCTATAA	CTGGAGATGGACACCTTGATG
Q-AcobZIP10	GGAGTTCCCGCCAATTGTA	TATCATCCTCCTCTTCCTCCTC
Q-AcobZIP13	CTCCTCCATGCGACCAAAC	ACTCGCGGTTCGAGATCA
Q-AcobZIP20	GAGAGAGCTGTTGACTCACTTC	TCTGCCTCCTCAATTGGTTATT
Q-AcobZIP22	CGAAAGGAAACCCTACCCATAAG	CACGAGGGTTGCTCTTCAATAA
Q-AcobZIP24	CTTCCTCACATGCTCTTCCTC	GGTGAGAGCAGTCGGATTATG
Q-AcobZIP26	GAGGCGAAGGTGAAGGATTT	CCCGCCTACTCAAAGTAGTATTC
Q-AcobZIP33	GCTCCTCAGATGGAAGTCAAAG	CTCGTTCAGATACGCCTTCTTC
Q-AcobZIP34	GCTCGTCCCTATTCCTAGATTG	CTTCTTGGTCCTGCTCTTCTC
Q-AcobZIP35	GGCAGAAGAGGATGATCAAGAA	CAAGCGCGAAACCTTGTTC
Q-AcobZIP36	GCTAAGGCACCAGTGAAGAA	CTCCTTAACACCTTGGGATCTG
Q-AcobZIP37	AGGGACCTTCAAACCAATCC	CTGTGGCTTTCCCATTGTTTC
Q-AcobZIP40	CAGCACTGAGTCCCACTTATC	CGGCATATCTGCCAACATACT
Q-AcobZIP42	GCAAGGAGTTGTTGGCATTAG	GTCTCAGTGTCTTGGGAGTTT
Q-AcobZIP44	GGATCAAGCCCTCTTCTTCTAC	TACATGCATGGGCTCAGAAG
Q-AcobZIP46	CTCTGCAAACAGAAGCAACTAC	CGCAACTTCAGCTCGTTATTT
Q-AcobZIP47	GAGCCCAACGGTCGAATTA	GCAGATACCTCAGTCTGTAACG
Q-Gmactin	AGCCACACTGTCCCTATCTA	GCTGAGGTGGTGAAGGAATAA
